# Supplementary material for: WEE1 kinase is a therapeutic vulnerability in CIC-DUX4 undifferentiated sarcoma
Source: PubMed Central journal article supplement (PMC8986087; doi:10.1172/jci.insight.152293), 2022-03-22
Supplement: jciinsight-7-152293-s005.pdf [file jciinsight-7-152293-s005.pdf]

## **Supplemental material**

**WEE1 kinase is a therapeutic vulnerability in CIC-DUX4 undifferentiated sarcoma.**

**Authors:** Rovingaile Kriska Ponce, Nicholas J. Thomas, Nam Q. Bui, Tadashi Kondo, and Ross A. Okimoto

The Supplemental material contains 6 figures and one table.

Supplementary Figure 1

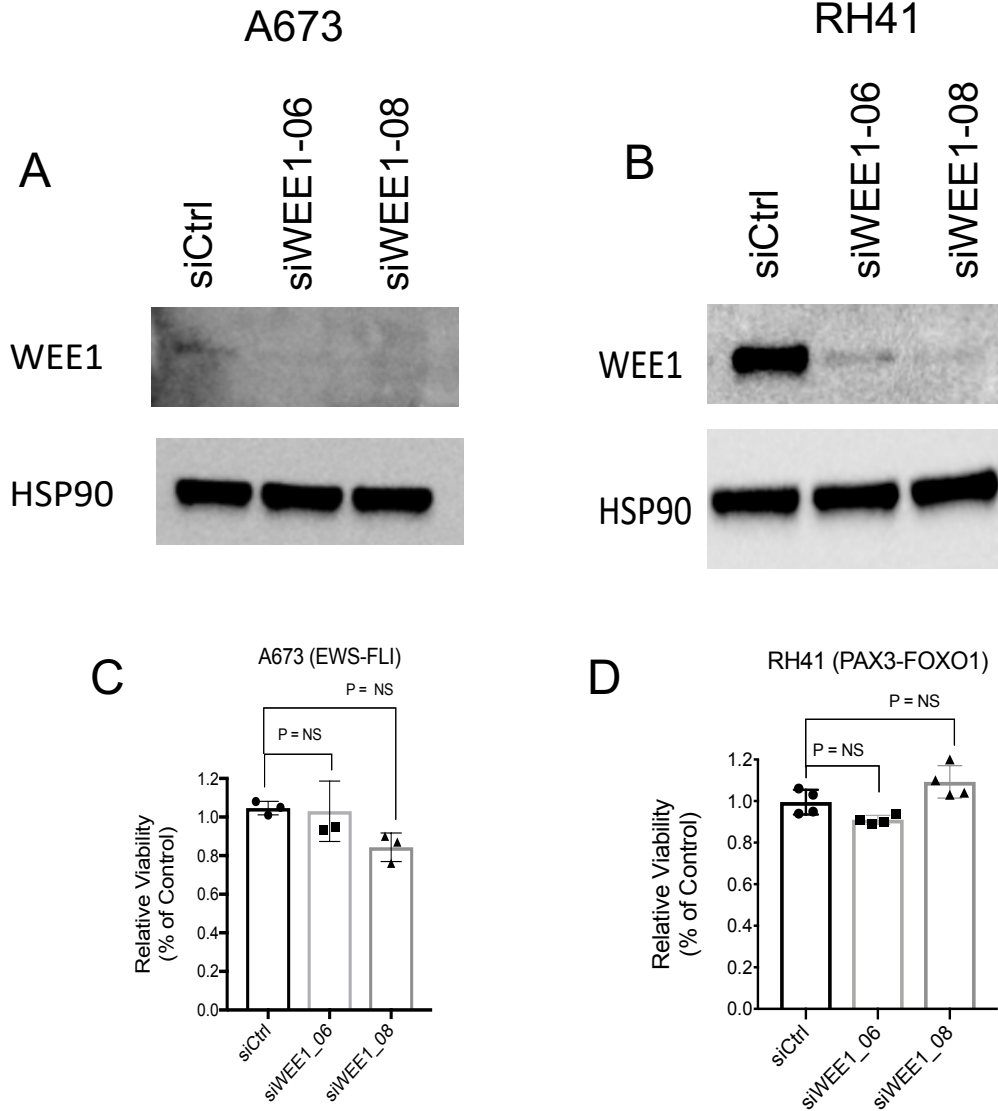

**Supplementary Figure 1. Genetic WEE1 inhibition in Ewing sarcoma and alveolar rhabdomyosarcoma cells.** (A) Immunoblot of WEE1 and HSP90 in A673 (A) and RH41 (B) cells expressing *siWEE1-06* or *siWEE1-08* compared to *siCtrl*. (B) Relative viability (CTG) of A673 (C) and RH41 (D) cells expressing *siWEE1-06* or *siWEE1-08* compared to *siCtrl*. Performed in quadruplicate. P-value calculated by 1-way ANOVA.

Supplementary Figure 2

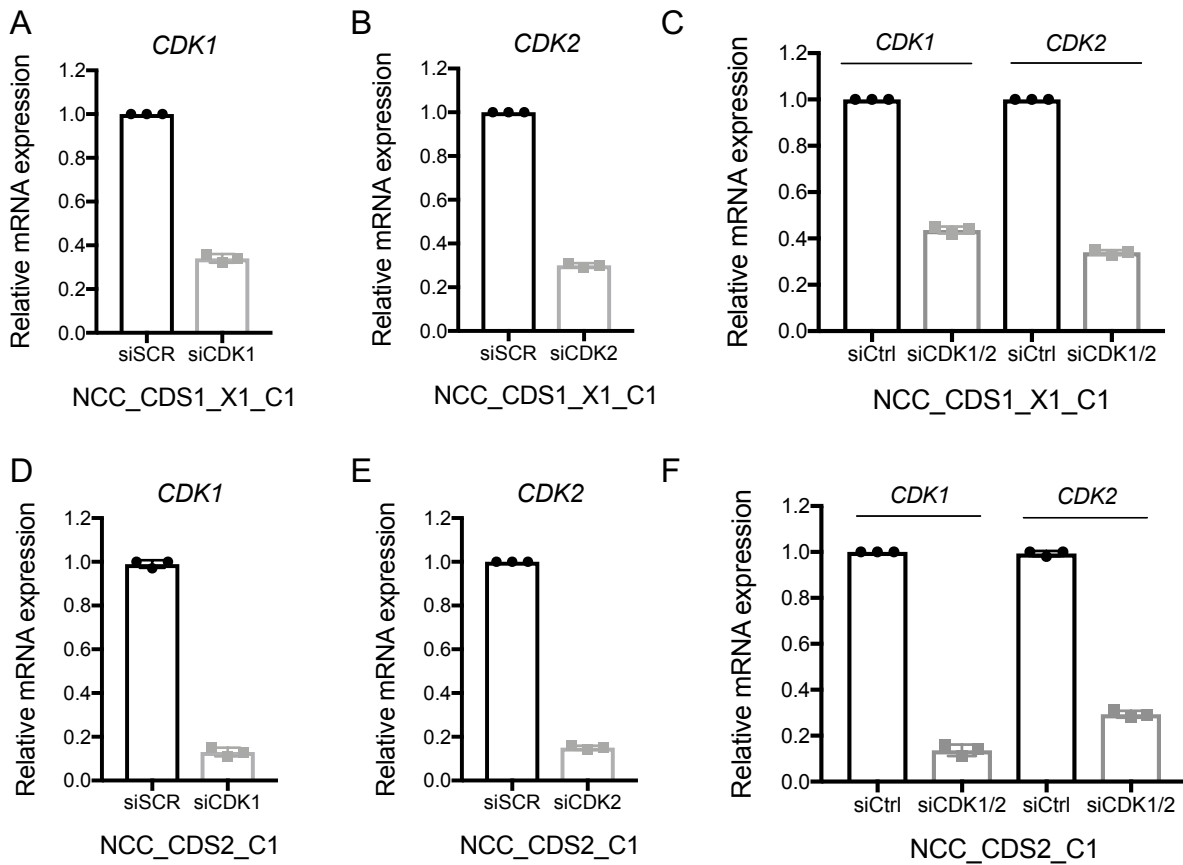

**Supplementary Figure 2. CDK1 and CDK2 genetic silencing in CIC-DUX4 cells.**

Relative mRNA expression of CDK1 (A), CDK2 (B), and CDK1 and CDK2 (C) in NCC\_CDS1\_X1\_C1 cells following siRNA-mediated knockdown. Relative mRNA expression of CDK1 (D), CDK2 (E), and CDK1 and CDK2 (F) in NCC\_CDS2\_C1 cells following siRNA-mediated knockdown.

Supplementary Figure 3

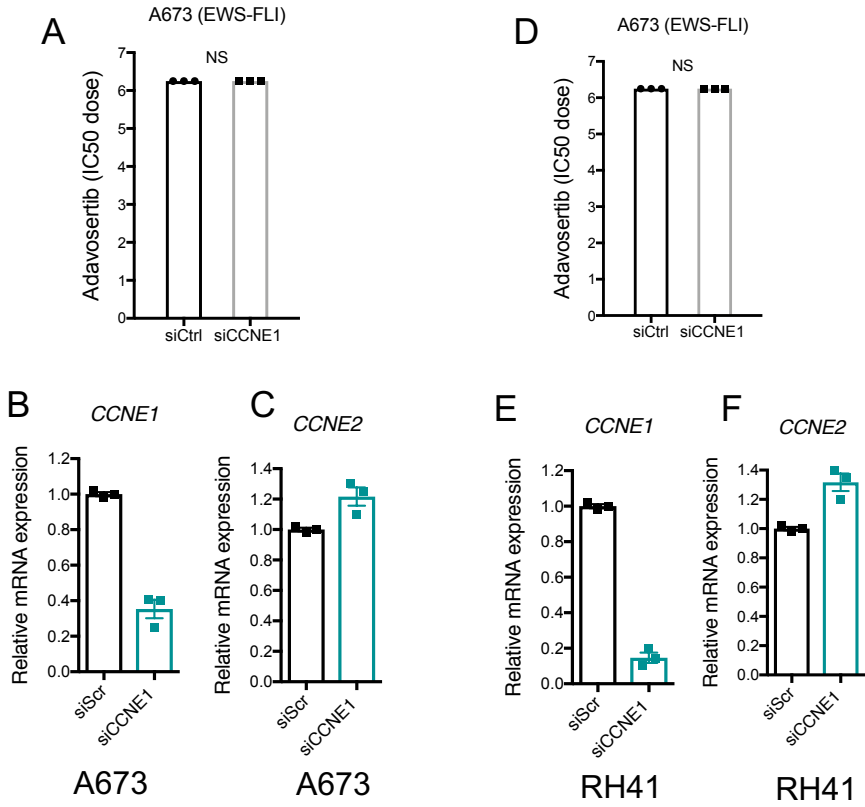

**Supplementary Figure 3. Sensitivity to adavosertib treatment is not dependent on CCNE1 expression in Ewing sarcoma and alveolar rhabdomyosarcoma cells.** Adavosertib IC50 dose of A673 (A) and RH41 (D) cells expressing *siCCNE1* or *siScr*. Performed in quadruplicate. P-value calculated by student's t-test. Relative *CCNE1* (B) and *CCNE2* (C) mRNA expression in A673 cells expressing either *siCCNE1* or *siCtrl*. Performed in triplicate. P-value calculated by student's t-test. Relative *CCNE1* (E) and *CCNE2* (F) mRNA expression in RH41 cells expressing either *siCCNE1* or *siCtrl*. Performed in triplicate. P-value calculated by student's t-test.

Supplementary Figure 4

**A**

| NCC_CDS1_X1_C1 |        |        |        |      |     |     |      |     |     |       |       |       |
|----------------|--------|--------|--------|------|-----|-----|------|-----|-----|-------|-------|-------|
| Cell Cycle     | %SubG1 | %SubG1 | %SubG1 | %G1  | %G1 | %G1 | %S   | %S  | %S  | %G2/M | %G2/M | %G2/M |
| DMSO           | 1.47   | 5.72   | 1.8    | 59.2 | 71  | 70  | 9.2  | 9.2 | 9.3 | 21.5  | 15    | 18    |
| Adavosertib    | 2.32   | 10     | 7      | 36.6 | 46  | 40  | 3.83 | 2.5 | 3   | 48    | 46    | 47    |

  

**B**

| NCC_CDS2_C1 |        |        |        |      |      |     |      |     |    |       |       |       |
|-------------|--------|--------|--------|------|------|-----|------|-----|----|-------|-------|-------|
| Cell Cycle  | %SubG1 | %SubG1 | %SubG1 | %G1  | %G1  | %G1 | %S   | %S  | %S | %G2/M | %G2/M | %G2/M |
| DMSO        | 4.8    | 15     | 10     | 30.6 | 54   | 42  | 3.37 | 12  | 8  | 25.88 | 24    | 24.5  |
| Adavosertib | 9.8    | 24.7   | 17     | 36.6 | 18.7 | 28  | 1.54 | 0.4 | 1  | 51.54 | 63.6  | 56    |

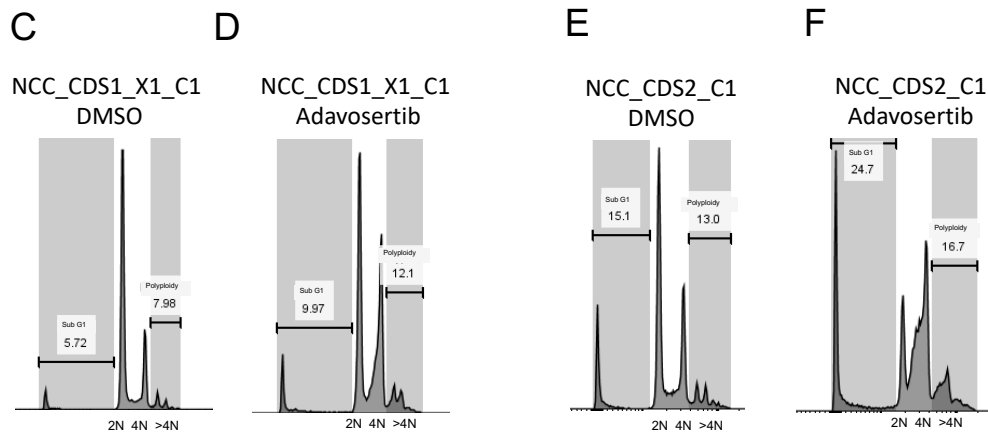

**Supplementary Figure 4. Pharmacologic WEE1 inhibition increases the G2/M, polyploidy (>4N), and sub G1 fractions in CIC-DUX4 sarcoma cells.**

(A) Individual data points from figure 3E demonstrating the fraction of cells in Sub-G1, G1, S, or G2/M phases of the cell cycle. (B) Individual data points from figure 3K demonstrating the fraction of cells in Sub-G1, G1, S, or G2/M phases of the cell cycle.

Representative figures of ungated cell cycle analysis profiles of NCC\_CDS1\_X1\_C1 cells treated with adavosertib (C) or DMSO (D) control. Performed in triplicate. Representative figures of ungated cell cycle analysis profiles of NCC\_CDS2\_C1 cells treated with adavosertib (E) or DMSO (F) control. Performed in triplicate.

Supplementary Figure 5

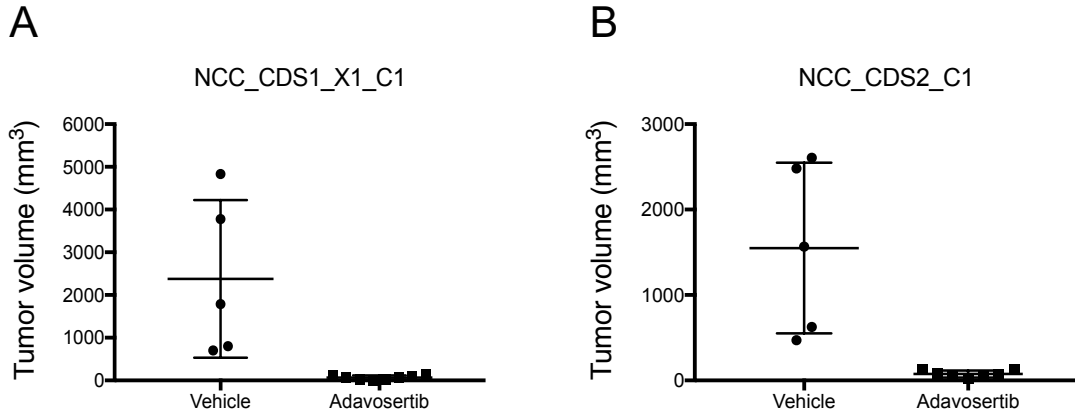

**C**

| NCC_CDS1_X1_C1 (% change from baseline tumor volume) |      |      |     |     |     |     |     |     |
|------------------------------------------------------|------|------|-----|-----|-----|-----|-----|-----|
| Mouse.#                                              | 1    | 2    | 3   | 4   | 5   | 6   | 7   | 8   |
| Vehicle                                              | 1115 | 1043 | 974 | 931 | 576 | 474 |     |     |
| Adavosertib                                          | -28  | -35  | -37 | -54 | -66 | -74 | -81 | -88 |

  

**D**

| NCC_CDS2_C1 (% change from baseline tumor volume) |      |      |     |     |     |     |
|---------------------------------------------------|------|------|-----|-----|-----|-----|
| Mouse.#                                           | 1    | 2    | 3   | 4   | 5   | 6   |
| Vehicle                                           | 1684 | 1205 | 770 | 681 | 494 |     |
| Adavosertib                                       | -46  | -51  | -65 | -66 | -68 | -69 |

**Supplementary Figure 5. Adavosertib decreases CIC-DUX4 tumor volume compared to vehicle control.** Comparative tumor xenograft size between adavosertib treated mice bearing NCC\_CDS1\_X1\_C1 (A) or NCC\_CDS2\_C1 (B) compared to vehicle control. (C) Individual data points from figure 4C demonstrating the % change from baseline tumor volume in each NCC\_CDS1\_X1\_C1 tumor bearing mouse. (D) Individual data points from figure 4C demonstrating the % change from baseline tumor volume in each NCC\_CDS2\_C1 tumor bearing mouse.

A

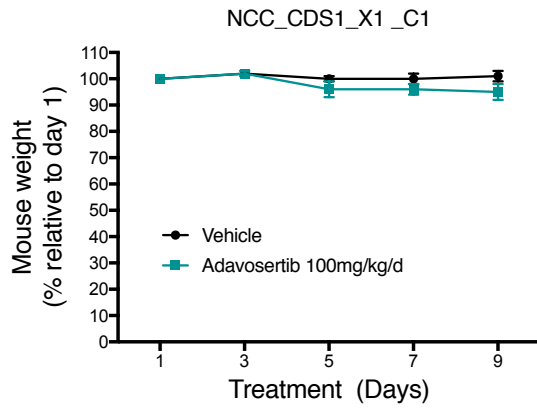

B

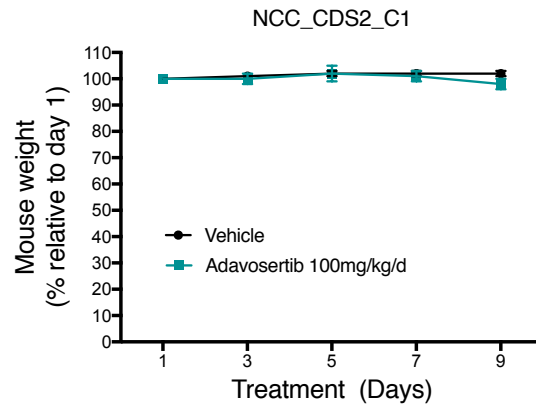

**Supplementary Figure 6. Adavosertib is well tolerated in mice.**

Serial weights of mice harboring NCC\_CDS1\_X1\_C1 (A) and NCC\_CDS2\_C1 (B) xenografts treated with adavosertib or vehicle control.

**Supplementary Table 1. 1426 differentially expressed genes in IB120 cells +/- CIC-DUX4 KD.**
